# Supplementary material for: Interaction of imidazolium-based ionic liquids with supported phospholipid bilayers as model biomembranes
Source: Royal Society of Chemistry journal article supplement (doi:10.1039/d2cp02866b), 2022-01-01
Supplement: d2cp02866b1.pdf [file d2cp02866b1.pdf]

# Interaction of imidazolium-based ionic liquids with supported phospholipid bilayers as model biomembranes

---

Massimiliano Galluzzi<sup>1,2,\*</sup>, Lorenzo Marfori<sup>2</sup>, Stefania Asperti<sup>2</sup>, Alessandro De Vita<sup>2</sup>, Matteo Giannangeli<sup>3</sup>, A. Caselli<sup>3</sup>, Paolo Milani<sup>2</sup>, Alessandro Podestà<sup>2,\*</sup>

<sup>1</sup>Materials Interfaces Center, Shenzhen Institutes of Advanced Technology, Chinese Academy of Sciences, Shenzhen 518055, Guangdong, China.

<sup>2</sup>C.I.Ma.I.Na and Dipartimento di Fisica “Aldo Pontremoli”, Università degli Studi di Milano, via Celoria 16, 20133 - Milano, Italy.

<sup>3</sup>Dipartimento di Chimica Chimica and CNR-SCITEC, Università degli Studi di Milano, via Celoria 16, 20133 - Milano, Italy.

\*Corresponding authors. E-mails: [alessandro.podesta@mi.infn.it](mailto:alessandro.podesta@mi.infn.it), [galluzzi@siat.ac.cn](mailto:galluzzi@siat.ac.cn).

## SUPPORTING INFORMATION

### Contents

|                                                                                                             |   |
|-------------------------------------------------------------------------------------------------------------|---|
| SUPPORTING INFORMATION.....                                                                                 | 1 |
| Additional figures.....                                                                                     | 2 |
| Figure SI1 .....                                                                                            | 2 |
| Figure SI2 .....                                                                                            | 3 |
| Figure SI3 .....                                                                                            | 4 |
| Additional Tables .....                                                                                     | 5 |
| Impact of the water layer between the mica substrate and the lipid bilayer on the mechanical analysis ..... | 5 |
| Table SI1. ....                                                                                             | 5 |
| Mechanical Analysis Data.....                                                                               | 5 |
| Table SI2a.....                                                                                             | 5 |
| Table SI2b. ....                                                                                            | 6 |
| Table SI2c.....                                                                                             | 6 |
| Table SI2d. ....                                                                                            | 7 |
| Electrostatic Force Analysis Data.....                                                                      | 7 |
| Table SI3a.....                                                                                             | 7 |
| Table SI3b. ....                                                                                            | 8 |
| Table SI3c.....                                                                                             | 8 |
| Table SI3d. ....                                                                                            | 9 |

## Additional figures

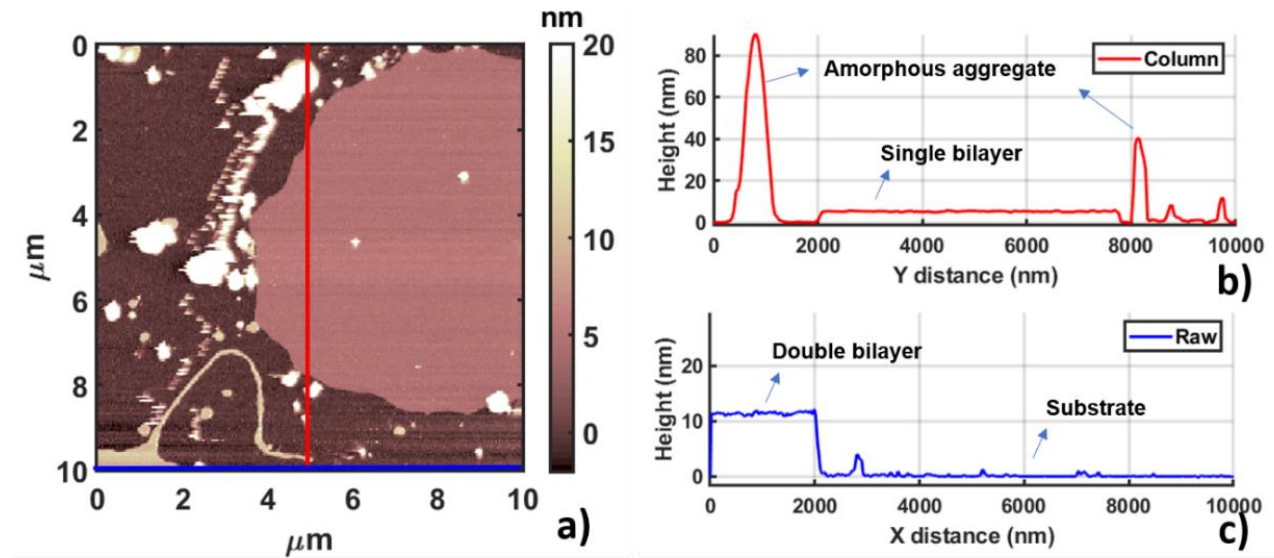

**Figure S11.** Representative AFM imaging of a DOPC bilayer. a) Morphology (Figure 2a(i) of main text); b) height profile along the red line, showing amorphous aggregates and a single bilayer; c) height profile along the blue line, showing the substrate and a double bilayer.

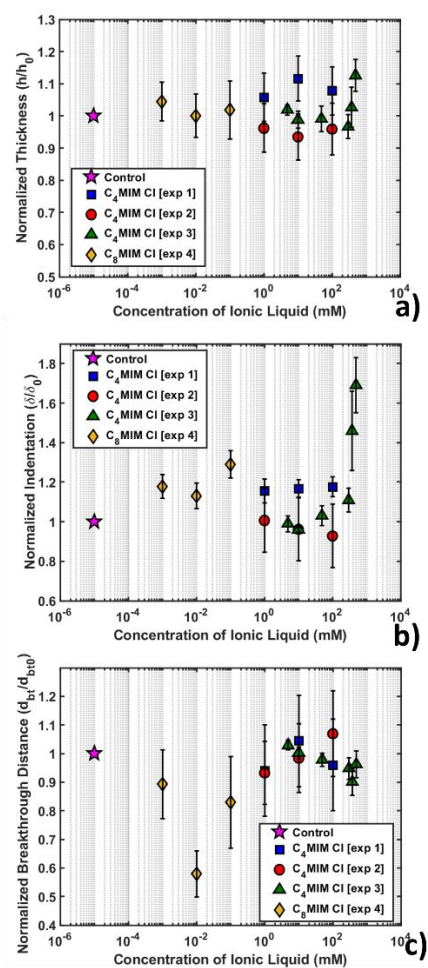

**Figure SI2.** Representation of morphological normalized quantities of DOPC bilayers after interaction with [C<sub>4</sub>MIM][Cl] and [C<sub>8</sub>MIM][Cl] at different concentrations. a) Thickness ( $h$ ), b) maximum indentation ( $d_{MAX}$ ), c) breakthrough distance ( $d_{bt}$ ). For reference, the control data point is showed on the graphs at  $10^{-5}$  mM.

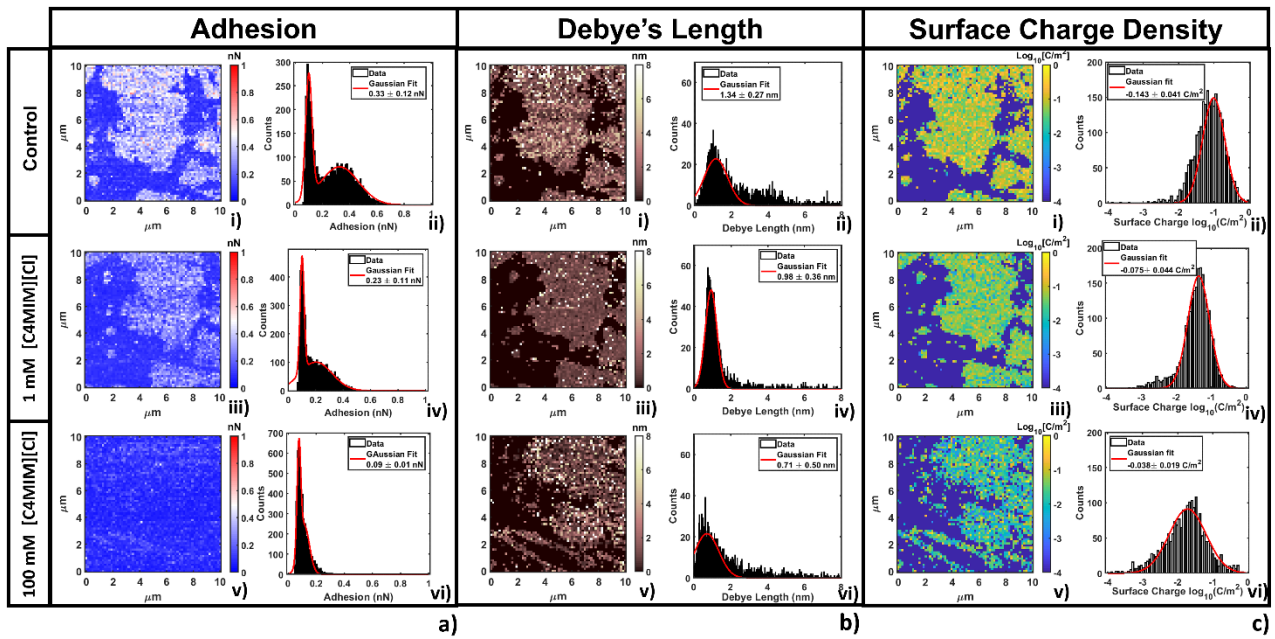

**Figure SI3.** Representative analysis of the evolution of a) adhesion force  $F_{ADH}$ , b) Debye's length  $l_D$  and c) surface charge density  $s_s$  for DOPC supported bilayer varying the concentration of  $[C_4MIM][Cl]$ . For each panel, image i) represents the map, image ii) the histogram with Gaussian fit focused on bilayer before interaction. In the same order iii-iv and v-vi, images represent the same location after 20 min interaction with 1 mM and 100 mM concentration, respectively.

## Additional Tables

### Impact of the water layer between the mica substrate and the lipid bilayer on the mechanical analysis

**Table SI1.** Mechanical analysis data after considering an error in the contact point determination ( $\pm 0.5$  nm). The values correspond to the force curve of Figure 1c. Symbol definition: R is tip radius (fixed at  $R = 20$  nm), C is the empirical multiplier of the number of Gaussian peak widths (standard deviations) away from the center (towards larger distances from the bilayer surface) in order to localize the contact point, h is thickness, F<sub>bt</sub> is breakthrough force, E is Young's modulus, k<sub>A</sub> is compressibility modulus,  $\lambda_D$  is Debye's length and  $\sigma_s$  is density of surface charges. The equation used to extract mechanical parameter is shown above the respective columns.

|     |        | Eq. 1                | Eq. 2   | Eq. 3                 | Eq. 4                 | Eq. 4            |                                 |
|-----|--------|----------------------|---------|-----------------------|-----------------------|------------------|---------------------------------|
| C   | h (nm) | F <sub>bt</sub> (nN) | E (MPa) | k <sub>A</sub> (mN/m) | k <sub>A</sub> (mN/m) | $\lambda_D$ (nm) | $\sigma_s$ (mC/m <sup>2</sup> ) |
| 2.5 | 5.94   | 8.36                 | 24.0    | 198                   | 190.1                 | 1.97             | -124                            |
| 2.2 | 5.46   | 8.36                 | 28.6    | 262                   | 208.2                 | 1.39             | -532                            |
| 2.8 | 6.42   | 8.36                 | 20.8    | 148                   | 178.0                 | 1.91             | -102                            |

### Mechanical Analysis Data

Each table represents an independent experiment using different probes or testing different conditions. Here, h represents the thickness of DOPC bilayer, F<sub>bt</sub> is the breakthrough force, E is the corrected Young's modulus. For all the quantities,  $\sigma$  [ ] represents the standard deviation of the mean, while var% is the percentage variation referenced with control (this quantity is averaged on the measurement group).

**Table SI2a.** Experiment 1. Mechanical data of DOPC phospholipid bilayer interacting with [C<sub>4</sub>MIM][Cl] at different concentrations.  $k = 0.14$  N/m, radius  $R = 10$  nm, optical lever sensitivity Defl. Sens. = 22.4 nm/V. Data are shown in Figure 6 main text.

| Condition | h (nm) | $\sigma$ [h] (nm) | var% | F <sub>bt</sub> (nN) | $\sigma$ [F <sub>bt</sub> ] (nN) | var% | E (MPa) | $\sigma$ [E] (MPa) | var% |
|-----------|--------|-------------------|------|----------------------|----------------------------------|------|---------|--------------------|------|
| Control   | 4.92   | 0.43              |      | 8.07                 | 0.76                             |      | 41      | 10.3               |      |
|           | 4.94   | 0.65              |      | 7.02                 | 0.64                             |      | 39.7    | 8.1                |      |
| 1 mM      | 5.27   | 0.46              |      | 6.60                 | 1.2                              |      | 28.7    | 3.2                |      |
|           | 5.16   | 0.34              | 5%   | 5.55                 | 0.43                             | -14% | 30      | 3.2                | -28% |
| 10 mM     | 5.60   | 0.23              |      | 4.41                 | 0.37                             |      | 29.5    | 2.6                |      |
|           | 5.41   | 0.33              | 11%  | 4.06                 | 0.49                             | -44% | 21.9    | 2.9                | -37% |
| 100 mM    | 5.61   | 0.43              |      | 2.81                 | 0.34                             |      | 21.3    | 2.2                |      |
|           | 5.02   | 0.27              | 7%   | 2.93                 | 0.28                             | -62% | 20.1    | 2.3                | -49% |

**Table SI2b.** Experiment 2. Mechanical data of DOPC phospholipid bilayer interacting with [C<sub>4</sub>MIM][Cl] at different concentrations.  $k = 0.25$  N/m,  $R = 10$  nm, Defl. Sens = 49.1 nm/V.

| Condition | h (nm) | $\sigma[h]$ (nm) | var% | F <sub>bt</sub> (nN) | $\sigma[F_{bt}]$ (nN) | var% | E (MPa) | $\sigma[E]$ (MPa) | var% |
|-----------|--------|------------------|------|----------------------|-----------------------|------|---------|-------------------|------|
| Control   | 5.96   | 0.59             |      | 9.83                 | 2.2                   |      | 196.5   | 14                |      |
|           | 6.39   | 0.47             |      | 12.38                | 3.12                  |      | 142     | 11                |      |
| 1 mM      | 5.86   | 0.34             |      | 9.7                  | 1.4                   |      | 119     | 33                |      |
|           | 5.06   | 0.48             | -12% | 10.3                 | 0.72                  | -10% | 195     | 21                | -8%  |
| 10 mM     | 5.63   | 0.72             |      | 8.31                 | 1.45                  |      | 120     | 21                |      |
|           | 4.98   | 0.64             | -14% | 10.7                 | 2.8                   | -15% | 167     | 29                | -16% |
| 100 mM    | 5.4    | 0.52             |      | 6.08                 | 1.5                   |      | 91.4    | 17.3              |      |
|           | 5.49   | 0.73             | -12% | 5.54                 | 1.41                  | -48% | 111     | 18                | -41% |

**Table SI2c.** Experiment 3. Mechanical data of DOPC phospholipid bilayer interacting with [C<sub>4</sub>MIM][Cl] at different concentrations.  $k = 0.72$  N/m,  $R = 10$  nm, Defl. Sens = 13.6 nm/V.

| Condition | h (nm) | $\sigma[h]$ (nm) | var% | F <sub>bt</sub> (nN) | $\sigma[F_{bt}]$ (nN) | var% | E (MPa) | $\sigma[E]$ (MPa) | var% |
|-----------|--------|------------------|------|----------------------|-----------------------|------|---------|-------------------|------|
| Control   | 5.32   | 0.09             |      | 1.54                 | 0.13                  |      | 66.3    | 5.75              |      |
|           | 5.43   | 0.1              |      | 1.54                 | 0.11                  |      | 68.3    | 4.9               |      |
| 5 mM      | 5.5    | 0.11             |      | 1.46                 | 0.13                  |      | 66      | 5                 |      |
|           | 5.5    | 0.11             |      | 1.41                 | 0.13                  |      | 67.6    | 5.2               |      |
|           | 5.44   | 0.1              | 2%   | 1.43                 | 0.08                  | -7%  | 65      | 4                 | -2%  |
| Control   | 4.59   | 0.12             |      | 2.52                 | 0.2                   |      | 53.6    | 3.2               |      |
|           | 4.61   | 0.13             |      | 2.51                 | 0.21                  |      | 53.7    | 3.3               |      |
| 10 mM     | 4.59   | 0.13             |      | 2.21                 | 0.22                  |      | 46.7    | 3.1               |      |
|           | 4.61   | 0.15             |      | 2.02                 | 0.19                  |      | 45.8    | 3.5               |      |
|           | 4.44   | 0.16             | -1%  | 2.05                 | 0.17                  | -17% | 45.1    | 3.1               | -15% |
| Control   | 5.73   | 0.14             |      | 1.66                 | 0.28                  |      | 75      | 7.8               |      |
|           | 5.67   | 0.12             |      | 1.59                 | 0.49                  |      | 80.9    | 11.8              |      |
|           | 5.97   | 0.18             |      | 1.43                 | 0.43                  |      | 64.1    | 9.6               |      |
| 50 mM     | 5.74   | 0.17             |      | 1.48                 | 0.32                  |      | 47.9    | 9.2               |      |
|           | 5.76   | 0.19             |      | 1.27                 | 0.39                  |      | 60      | 10                |      |
|           | 5.73   | 0.17             | -1%  | 1.74                 | 0.43                  | -5%  | 69.8    | 9.4               | -20% |
| Control   | 5.32   | 0.1              |      | 2.91                 | 0.15                  |      | 145.5   | 5.4               |      |
|           | 5.31   | 0.09             |      | 2.67                 | 0.13                  |      | 92.1    | 7.2               |      |
|           | 5.24   | 0.1              |      | 2.89                 | 0.15                  |      | 63      | 4.8               |      |
| 300 mM    | 4.93   | 0.15             |      | 1.85                 | 0.12                  |      | 71.3    | 8.1               |      |
|           | 5.2    | 0.12             |      | 1.86                 | 0.12                  |      | 85      | 9                 |      |
|           | 5.22   | 0.17             | -4%  | 2.13                 | 0.16                  | -32% | 56.9    | 5.4               | -30% |
| Control   | 5.18   | 0.28             |      | 7.37                 | 0.36                  |      | 478.8   | 69                |      |
| 383 mM    | 5.07   | 0.27             |      | 4.5                  | 0.45                  |      | 358     | 122               |      |
|           | 4.82   | 0.28             |      | 5.17                 | 0.5                   |      | 221     | 68                |      |
|           | 6.07   | 0.45             | 2%   | 4.05                 | 0.41                  | -38% | 83      | 13                | -54% |
| 500 mM    | 6.03   | 0.18             |      | 3.06                 | 0.32                  |      | 101     | 16                |      |
|           | 5.73   | 0.43             |      | 2.7                  | 0.26                  |      | 87      | 25                |      |
|           | 5.74   | 0.26             | 12%  | 3.17                 | 0.32                  | -60% | 89      | 27                | -81% |

**Table SI2d.** Experiment 4. Mechanical data of DOPC phospholipid bilayer interacting with [C<sub>8</sub>MIM][Cl] at different concentrations.  $k = 1.65$  N/m,  $R = 10$  nm,  $Z_{\text{sens}} = 14.6$  nm/V.

| Condition         | h (nm) | $\sigma[h]$ (nm) | var% | $F_{\text{bt}}$ (nN) | $\sigma[F_{\text{bt}}]$ (nN) | var% | E (MPa) | $\sigma[E]$ (MPa) | var% |
|-------------------|--------|------------------|------|----------------------|------------------------------|------|---------|-------------------|------|
| Control           | 4.93   | 0.44             |      | 14.47                | 1.31                         |      | 85.6    | 2.1               |      |
|                   | 4.97   | 0.33             |      | 14.6                 | 1.56                         |      | 88.2    | 6.0               |      |
|                   | 5.27   | 0.26             |      | 14.97                | 0.62                         |      | 80.1    | 5.9               |      |
| 1 $\mu\text{M}$   | 5.09   | 0.18             |      | 13.17                | 1.07                         |      | 89      | 4.1               |      |
|                   | 5.55   | 0.47             |      | 13.32                | 0.72                         |      | 81.3    | 3.9               |      |
|                   | 5.17   | 0.28             | 4%   | 12.92                | 1.07                         | -11% | 78.6    | 9.7               | -4%  |
| 10 $\mu\text{M}$  | 4.97   | 0.07             |      | 11.95                | 1.1                          |      | 79.5    | 6.2               |      |
|                   | 5.19   | 0.17             |      | 11.65                | 0.92                         |      | 80      | 4.4               |      |
|                   | 5.2    | 0.19             | 0%   | 12.68                | 1.03                         | -19% | 77      | 13                | -6%  |
| 100 $\mu\text{M}$ | 5.09   | 0.28             |      | 10.32                | 1.02                         |      | 67      | 4.8               |      |
|                   | 5.34   | 0.18             | 2%   | 11.11                | 0.61                         | -28% | 72.9    | 6.1               | -17% |

### Electrostatic Force Analysis Data

Each table represents an independent experiment using different probes or testing different conditions. Here,  $F_{\text{ADH}}$  represents the adhesion force during retraction curve,  $\lambda_{\text{D}}$  is the Debye's length and  $\sigma_{\text{s}}$  is the surface charge density of the bilayer. For all the quantities,  $\sigma[\ ]$  represents the standard deviation of the mean, while var% is the percentage variation referenced with control (this quantity is averaged on the measurement group).

**Table SI3a.** Experiment 1. Electrostatic data of DOPC phospholipid bilayer interacting with [C<sub>4</sub>MIM][Cl] at different concentrations.  $k = 0.14$  N/m,  $R = 10$  nm, optical lever sensitivity  $Z_{\text{sens}} = 22.4$  nm/V and probe surface charge density  $\sigma_{\text{P}} = -9 \times 10^{-3}$  C/m<sup>2</sup>. Data are shown in Figure SI2 in SI.

| Condition | $F_{\text{ADH}}$ (nN) | $\sigma[F_{\text{ADH}}]$ (nN) | var% | $\lambda_{\text{D}}$ (nm) | $\sigma[\lambda_{\text{D}}]$ (nm) | var% | $\sigma_{\text{s}}$ (C/m <sup>2</sup> ) | $\sigma[\sigma_{\text{s}}]$ (C/m <sup>2</sup> ) | var% |
|-----------|-----------------------|-------------------------------|------|---------------------------|-----------------------------------|------|-----------------------------------------|-------------------------------------------------|------|
| Control   | 0.283                 | 0.139                         |      | 0.930                     | 0.540                             |      | -0.198                                  | 0.070                                           |      |
|           | 0.348                 | 0.121                         |      | 1.344                     | 0.273                             |      | -0.143                                  | 0.041                                           |      |
| 1 mM      | 0.249                 | 0.115                         |      | 1.271                     | 0.512                             |      | -0.076                                  | 0.041                                           |      |
|           | 0.210                 | 0.112                         | -26% | 0.989                     | 0.367                             | -1%  | -0.075                                  | 0.044                                           | -56% |
| 10 mM     | 0.212                 | 0.123                         |      | 0.910                     | 0.310                             |      | -0.069                                  | 0.031                                           |      |
|           | 0.148                 | 0.109                         | -42% | 0.891                     | 0.578                             | -21% | -0.060                                  | 0.029                                           | -62% |
| 100 mM    | 0.075                 | 0.012                         |      | 0.719                     | 0.464                             |      | -0.036                                  | 0.023                                           |      |
|           | 0.079                 | 0.013                         | -76% | 0.713                     | 0.506                             | -38% | -0.038                                  | 0.019                                           | -78% |

**Table SI3b.** Experiment 2. Electrostatic data of DOPC phospholipid bilayer interacting with [C<sub>4</sub>MIM][Cl] at different concentrations.  $k = 0.25$  N/m, radius  $R = 10$  nm,  $Z_{sens} = 49.1$  nm/V and  $\sigma_p = -9 \times 10^{-3}$  C/m<sup>2</sup>.

| Condition | F <sub>ADH</sub> (nN) | $\sigma$ [F <sub>ADH</sub> ] (nN) | var% | $\lambda_D$ (nm) | $\sigma$ [ $\lambda_D$ ] (nm) | var% | $\sigma_s$ (C/m <sup>2</sup> ) | $\sigma$ [ $\sigma_s$ ] (C/m <sup>2</sup> ) | var% |
|-----------|-----------------------|-----------------------------------|------|------------------|-------------------------------|------|--------------------------------|---------------------------------------------|------|
| Control   | 0.29                  | 0.21                              |      | 0.48             | 0.14                          |      | -0.127                         | 0.043                                       |      |
|           | 0.35                  | 0.14                              |      | 0.46             | 0.17                          |      | -0.133                         | 0.053                                       |      |
| 1 mM      | 0.38                  | 0.13                              |      | 1.1              | 0.35                          |      | -0.293                         | 0.023                                       |      |
|           | 0.41                  | 0.17                              | 22%  | 1.29             | 0.43                          | 152% | -0.104                         | 0.052                                       | 53%  |
| 10 mM     | 1.06                  | 0.67                              |      | 1.16             | 0.5                           |      | -0.099                         | 0.054                                       |      |
|           | 0.62                  | 0.17                              | 164% | 1.42             | 0.55                          | 172% | -0.061                         | 0.021                                       | -38% |
| 100 mM    | 0.41                  | 0.17                              |      | 1.37             | 0.47                          |      | -0.031                         | 0.008                                       |      |
|           | 0.64                  | 0.21                              | 65%  | 1.74             | 0.36                          | 228% | -0.025                         | 0.006                                       | -79% |

**Table SI3c.** Experiment 3. Electrostatic data of DOPC phospholipid bilayer interacting with [C<sub>4</sub>MIM][Cl] at different concentrations.  $k = 0.72$  N/m,  $R = 10$  nm,  $Z_{sens} = 13.6$  nm/V,  $\sigma_p = -9 \times 10^{-3}$  C/m<sup>2</sup>.

| Condition | F <sub>ADH</sub> (nN) | $\sigma$ [F <sub>ADH</sub> ] (nN) | var% | $\lambda_D$ (nm) | $\sigma$ [ $\lambda_D$ ] (nm) | var% | $\sigma_s$ (C/m <sup>2</sup> ) | $\sigma$ [ $\sigma_s$ ] (C/m <sup>2</sup> ) | var% |
|-----------|-----------------------|-----------------------------------|------|------------------|-------------------------------|------|--------------------------------|---------------------------------------------|------|
| Control   | 0.549                 | 0.065                             |      | 0.211            | 0.075                         |      | -0.099                         | 0.025                                       |      |
|           | 0.564                 | 0.062                             |      | 0.224            | 0.073                         |      | -0.092                         | 0.029                                       |      |
| 5mM       | 0.572                 | 0.075                             |      | 0.207            | 0.061                         |      | -0.087                         | 0.024                                       |      |
|           | 0.469                 | 0.067                             |      | 0.21             | 0.054                         |      | -0.084                         | 0.023                                       |      |
|           | 0.416                 | 0.070                             | -12% | 0.205            | 0.066                         | -5%  | -0.084                         | 0.021                                       | -12% |
| Control   | 1.063                 | 0.147                             |      | 0.622            | 0.084                         |      | -0.115                         | 0.006                                       |      |
|           | 1.096                 | 0.171                             |      | 0.609            | 0.076                         |      | -0.113                         | 0.017                                       |      |
| 10mM      | 0.969                 | 0.137                             |      | 0.648            | 0.064                         |      | -0.109                         | 0.009                                       |      |
|           | 0.788                 | 0.136                             |      | 1.035            | 0.168                         |      | -0.067                         | 0.009                                       |      |
|           | 0.82                  | 0.162                             | -21% | 0.973            | 0.208                         | +43% | -0.068                         | 0.014                                       | -29% |
| Control   | 0.568                 | 0.104                             |      | 0.714            | 0.164                         |      | -0.087                         | 0.026                                       |      |
|           | 0.495                 | 0.099                             |      | 1.15             | 0.44                          |      | -0.043                         | 0.019                                       |      |
| 50 mM     | 0.479                 | 0.108                             |      | 2.13             | 0.81                          |      | -0.027                         | 0.014                                       |      |
|           | 0.478                 | 0.14                              |      | 0.819            | 0.659                         |      | -0.058                         | 0.047                                       |      |
|           | 0.358                 | 0.096                             | -18% | 0.427            | 0.132                         | +20% | -0.076                         | 0.026                                       | -18% |
| Control   | 1.398                 | 0.103                             |      | 0.829            | 0.132                         |      | -0.205                         | 0.018                                       |      |
|           | 1.057                 | 0.112                             |      | 0.838            | 0.156                         |      | -0.186                         | 0.034                                       |      |
|           | 0.783                 | 0.136                             |      | 0.573            | 0.078                         |      | -0.198                         | 0.024                                       |      |
| 300 mM    | 0.289                 | 0.095                             |      | 0.882            | 0.131                         |      | -0.157                         | 0.024                                       |      |
|           | 0.207                 | 0.06                              |      | 0.649            | 0.092                         |      | -0.111                         | 0.018                                       |      |
|           | 0.209                 | 0.073                             | -79% | 0.622            | 0.103                         | -4%  | -0.129                         | 0.022                                       | -33% |
| Control   | 1.44                  | 0.42                              |      | 4.06             | 0.57                          |      | -0.066                         | 0.005                                       |      |
| 383mM     | 1.98                  | 0.3                               |      | 2.4              | 0.9                           |      | -0.804                         | 0.247                                       |      |
|           | 2.24                  | 0.33                              |      | 3.5              | 2.5                           |      | -0.007                         | 0.003                                       |      |
|           | 1.48                  | 0.35                              | +32% | 3.4              | 4                             | -24% | -0.008                         | 0.002                                       | -52% |
| 500 mM    | 2.31                  | 0.34                              |      | 1.13             | 0.79                          |      | -0.025                         | 0.007                                       |      |
|           | 1.79                  | 0.185                             |      | 1.95             | 1.05                          |      | -0.016                         | 0.004                                       |      |
|           | 1.79                  | 0.19                              | +36% | 1.92             | 0.85                          | -59% | -0.015                         | 0.004                                       | -92% |



**Table SI3d.** Experiment 4. Electrostatic data of DOPC phospholipid bilayer interacting with [C<sub>8</sub>MIM][Cl] at different concentrations.  $k = 1.65 \text{ N/m}$ ,  $R = 10 \text{ nm}$ ,  $Z_{\text{sens}} = 14.6 \text{ nm/V}$ ,  $\sigma_p = -9 \times 10^{-3} \text{ C/m}^2$ .

| Condition         | $F_{\text{ADH}}$<br>(nN) | $\sigma[F_{\text{ADH}}]$<br>(nN) | var% | $\lambda_D$ (nm) | $\sigma[\lambda_D]$<br>(nm) | var% | $\sigma_s$ (C/m <sup>2</sup> ) | $\sigma(\sigma_s)$<br>(C/m <sup>2</sup> ) | var% |
|-------------------|--------------------------|----------------------------------|------|------------------|-----------------------------|------|--------------------------------|-------------------------------------------|------|
| Control           | 0.156                    | 0.08                             |      | 0.95             | 0.38                        |      | -0.831                         | 0.140                                     |      |
|                   | 0.58                     | 0.15                             |      | 1.48             | 3.14                        |      | -0.091                         | 0.030                                     |      |
|                   | 0.51                     | 0.23                             |      | 2.59             | 0.41                        |      | -0.145                         | 0.025                                     |      |
| 1 $\mu\text{M}$   | 0.91                     | 0.18                             |      | 1.69             | 0.61                        |      | -0.364                         | 0.037                                     |      |
|                   | 0.8                      | 0.21                             |      | 3.32             | 1.17                        |      | -0.128                         | 0.061                                     |      |
|                   | 0.74                     | 0.16                             | +96% | 3.25             | 1.2                         | +64% | -0.127                         | 0.039                                     | -42% |
| 10 $\mu\text{M}$  | 0.78                     | 0.15                             |      | 1.24             | 2.23                        |      | -0.096                         | 0.017                                     |      |
|                   | 0.71                     | 0.13                             |      | 3.33             | 1.22                        |      | -0.091                         | 0.033                                     |      |
|                   | 0.78                     | 0.16                             | -8%  | 2.29             | 1.32                        | -17% | -0.059                         | 0.010                                     | -77% |
| 100 $\mu\text{M}$ | 0.99                     | 0.14                             |      | 1.95             | 1.12                        |      | -0.068                         | 0.028                                     |      |
|                   | 0.85                     | 0.16                             | +21% | 3.73             | 2.45                        | +18% | -0.045                         | 0.016                                     | -85% |
